# Supplementary material for: Fabrication and electrical properties of printed three-dimensional integrated carbon nanotube PMOS inverters on flexible substrates
Source: Royal Society of Chemistry journal article supplement (doi:10.1039/d1nr08056c), 2022-01-01
Supplement: d1nr08056c1.pdf [file d1nr08056c1.pdf]

## Supporting Information

### **Fabrication and electrical properties of printed three-dimensional integrated carbon nanotube PMOS inverters on flexible substrates**

Jie Deng<sup>1,2,3</sup>, Xiaoqian Li<sup>3</sup>, Min Li<sup>3</sup>, Xin Wang<sup>3</sup>, Shuangshuang Shao<sup>2,3</sup>, Jiaqi Li<sup>1,2,3</sup>,  
Yuxiao Fang<sup>2,3\*</sup>, Jianwen Zhao<sup>2,3\*</sup>

<sup>1</sup>Institute of Nano Science and Technology, University of Science and Technology of China, 166 Ren Ai Road, SEID SIP, Suzhou, Jiangsu, 215123, PR China

<sup>2</sup>School of Nano-Tech and Nano-Bionics, University of Science and Technology of China, No. 398 Ruoshui Road, SEID, Suzhou Industrial Park, Suzhou, Jiangsu Province, 215123, PR China

<sup>3</sup> Division of Nanodevices and Related Nanomaterials, Suzhou Institute of Nano-Tech and Nano-Bionics, Chinese Academy of Sciences, No. 398 Ruoshui Road, SEID, Suzhou Industrial Park, Suzhou, Jiangsu Province, 215123, PR China

\* Corresponding authors.

Email: J.W. Zhao ([jwzhao2011@sinano.ac.cn](mailto:jwzhao2011@sinano.ac.cn));

[Y.X. Fang \(yxfang2021@sinano.ac.cn\)](mailto:Y.X. Fang (yxfang2021@sinano.ac.cn))

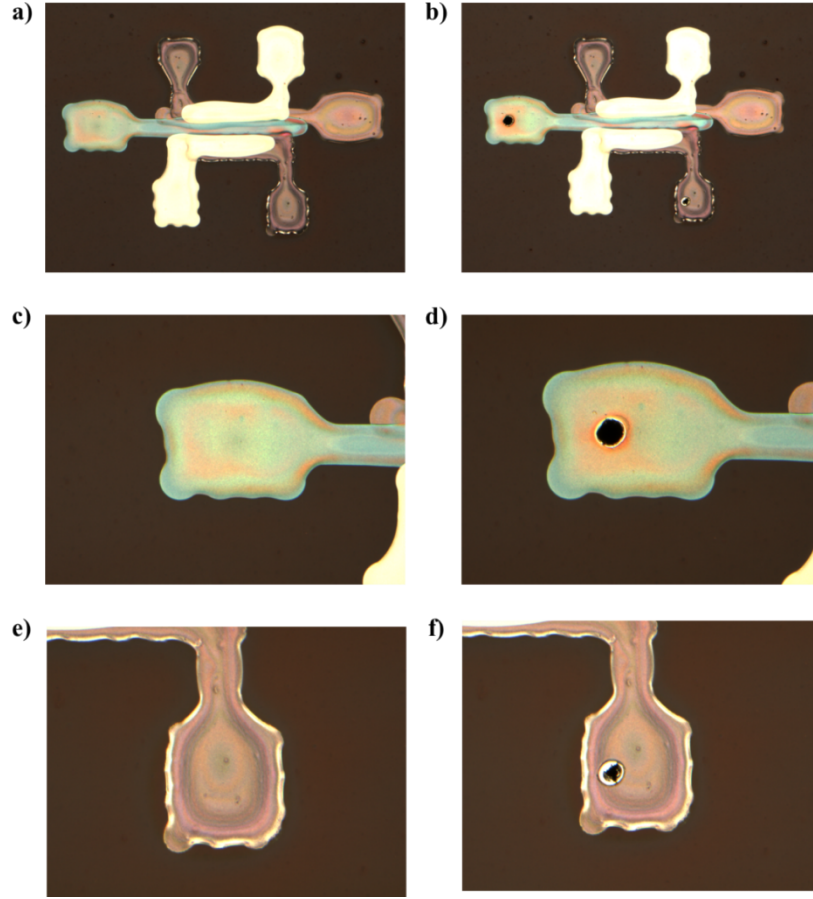

**Figure S1:** a, b) Manufacturing positions of through-holes in the manufacturing of SWCNT 3D PMOS inverters printed on PI substrates. c-f) Through-holes prepared by laser drilling.

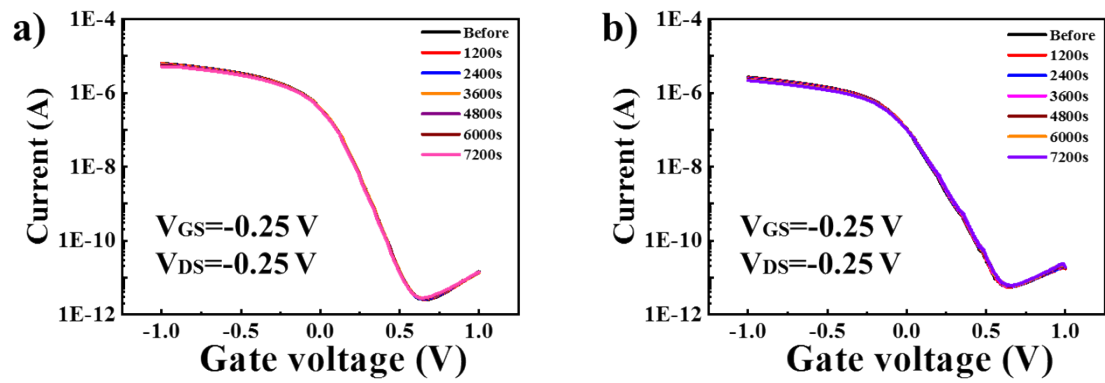

**Figure S2:** Transfer characteristic ( $I_{DS}$ - $V_{GS}$ ) curves of a) bottom-layer device and b) top-layer device measured every 1200 s under continuous bias ( $V_{DS} = -0.25$  V,  $V_{GS} = -0.25$  V).
